# Supplementary material
Source: publisher figshare collection journal article supplement (https://acs.figshare.com/ndownloader/files/4211287)
Supplement: Supplementary file 1 [file 4211287]

MOE commands (SVL):

#### IMPORT

```
MOL2:      db_ImportMOL2 ['input file', './tmp.mdb', 'mol']
SDF:       db_ImportSD ['./tmp.mdb', 'input file', 'mol']
SMILES:    db_ImportASCII[db_file:'./tmp.mdb', ascii_file:'input file', names:['mol', 'name'], types:
           ['molecule', 'char'], quotes:0, titles:0]
```

#### EXPORT

```
MOL2:      db_ExportTriposMOL2 ['./tmp.mdb', 'output file', 'mol', []]
SDF:       db_ExportSD ['./tmp.mdb', 'output file', 'mol', []]
SMILES:    db_ExportASCII ['./tmp.mdb', 'output file', ['mol'], db_Entries './tmp.mdb', [delimiter:', ',
           quotes:0, titles:0]]
```

#### CONVERSION

```
moebatch ' -exec "db_Open ['./tmp.mdb', 'create']; IMPORT; EXPORT; fdelete './tmp.mdb';" -exit'
```
